# Supplementary material for: Metal–organic frameworks as an efficient Pickering interfacial catalyst for the deacetalization-Knoevenagel tandem reaction
Source: Royal Society of Chemistry journal article supplement (doi:10.1039/d3nj00788j), 2023-01-01
Supplement: d3nj00788j1.pdf [file d3nj00788j1.pdf]

# Supporting Information

## **Metal-Organic Frameworks as the Efficient Pickering Interfacial Catalyst for Deacetalization-Knoevenagel Tandem Reaction**

Yan-Sai Bao,<sup>a</sup> Wei Liu,<sup>a</sup> Zhen-Lin Dong,<sup>b</sup> Zhi-Qiang Xing,<sup>a</sup> Ming Yang,<sup>a</sup> Yong-He Cui,<sup>a</sup> Ling-Xu Meng,<sup>a</sup> Liang-Cheng Li,<sup>a</sup> Xiao-Meng Xu,<sup>a</sup> Zheng-Bo Han<sup>a</sup> and Yu-Yang Zhang<sup>\*a</sup>

<sup>a</sup> College of Chemistry, Liaoning University, Shenyang 110036, P. R. China

<sup>b</sup> Technology Center of Dalian Customs, Dalian 116001, China

\*Yu-Yang Zhang: [yyzhang@lnu.edu.cn](mailto:yyzhang@lnu.edu.cn)

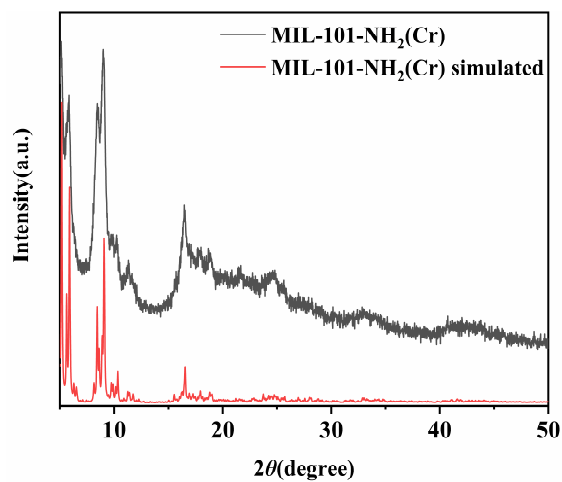

**Figure S1.** PXRD patterns of MIL-101(Cr)-NH<sub>2</sub>, MIL-101(Cr)-NH<sub>2</sub> simulated.

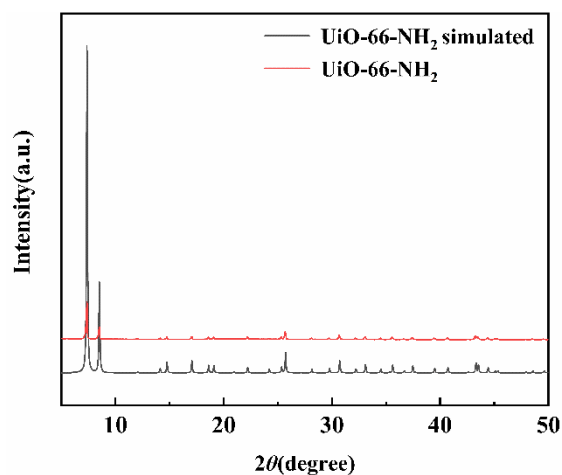

**Figure S2.** PXRD patterns of UiO-66(Zr)-NH<sub>2</sub>, UiO-66(Zr)-NH<sub>2</sub> simulated.

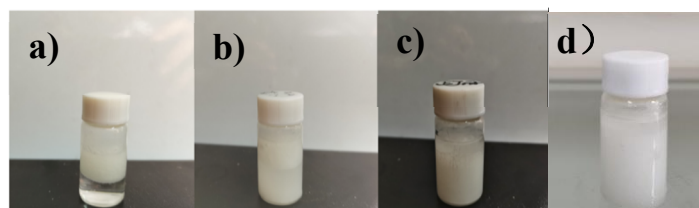

**Figure S3.** Photographs of Organic phase-water emulsions stabilized by 50mg ZIF-8: The vial contains (a) 2 mL of cyclohexane and 3 mL of water ; (b) 2 mL of n-hexane and 3 mL of water; (c) 2 mL n-butanol of and 3 mL of water. (d) 2 mL toluene of and 3 mL of water.

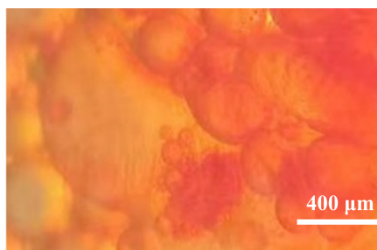

**Figure S4.** Optical microscope images of the 40 mg ZIF-8 stabilized Pickering emulsion with a water-to-toluene ratio of 3:2 and the emulsion stained with Rhodamine B and methyl red.

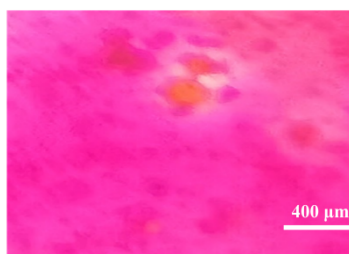

**Figure S5.** Optical microscope images of the 60 mg ZIF-8 stabilized Pickering emulsion with a water-to-toluene ratio of 3:2 and the emulsion stained with Rhodamine B and methyl red.

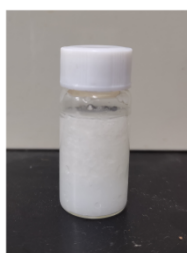

**Figure S6.** Photographs of the toluene-water emulsion stabilized by 50 mg ZIF-8( photograph was taken after standing for 3 weeks).

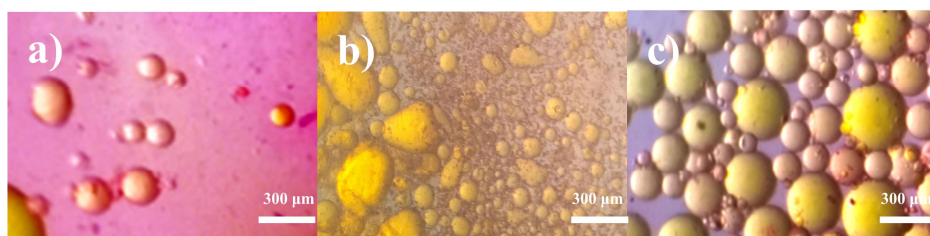

**Figure S7.** Optical microscope images of 50 mg MIL-101(Cr)-NH<sub>2</sub> stabilized Pickering emulsions stained with Rhodamine B and methyl red with different water-to-toluene ratios of (a) 3:2 (b) 1:1 and (c) 2:3.

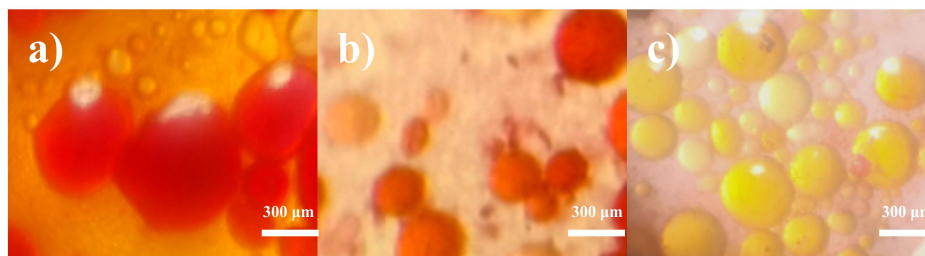

**Figure S8.** Optical microscope images of 50 mg UiO-66(Zr)-NH<sub>2</sub> stabilized Pickering emulsions stained with Rhodamine B and methyl red with different water-to-toluene ratios of (a) 3:2 (b) 1:1 and (c) 2:3.

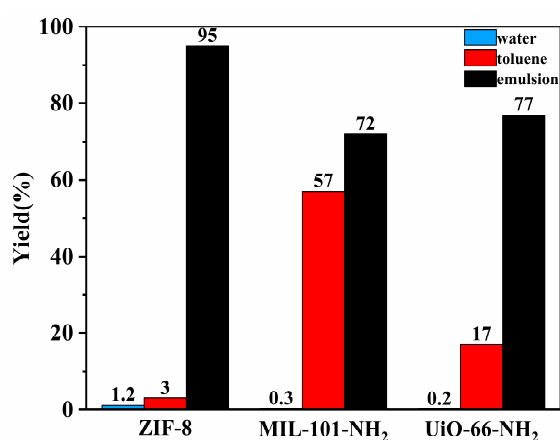

**Figure S9.** The yield of deacetalization-Knoevenagel reaction by ZIF-8, UiO-66(Zr)-NH<sub>2</sub>, and MIL-101(Cr)-NH<sub>2</sub> in water, toluene, and emulsion respectively. Reaction conditions: benzaldehyde dimethyl acetal (1 mmol) and malononitrile (1.5 mmol), 5.0 mL Pickering emulsion (3 mL water, 2 mL toluene), reaction time (6 h), reaction temperature: 353 K, catalyst (50 mg). The yield was determined by GC.

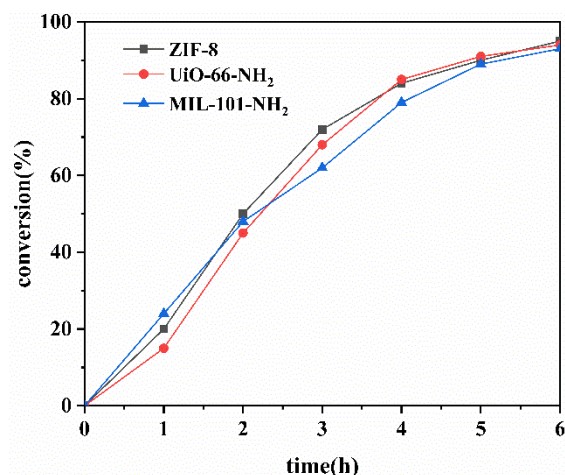

**Figure S10.** Time conversion diagrams for the catalytic deacetalisation-Knoevenagel tandem reactions of ZIF-8, UiO-66-NH<sub>2</sub> and MIL-101-NH<sub>2</sub> in their respective optimum water-to-oil ratio emulsions.

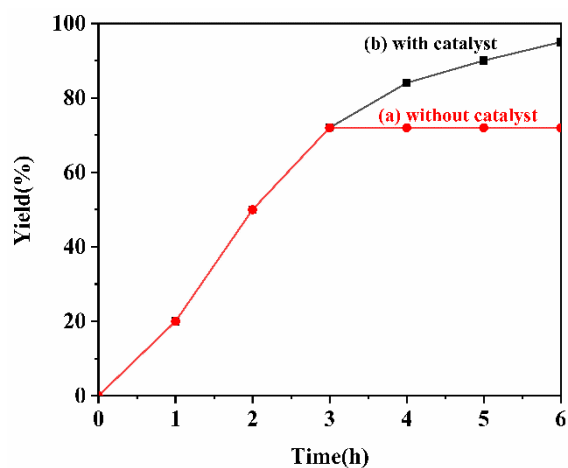

**Figure S11.** Hot filtration tests of the ZIF-8 catalyst for deacetalization-Knoevenagel tandem reaction: (a) catalyst was filtered out after the reaction lasted for 3 hours. (b) Normal reaction process.

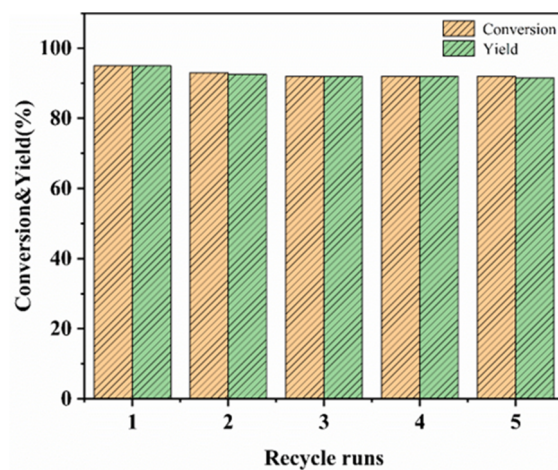

**Figure S12.** Recycle tests of ZIF-8 for deacetalization-Knoevenagel tandem reaction.

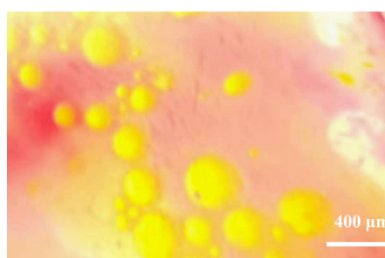

**Figure S13.** Optical microscope images of water (3 mL)-toluene (2 mL) emulsion stabilized by 50 mg ZIF-8 after the fifth catalytic run.

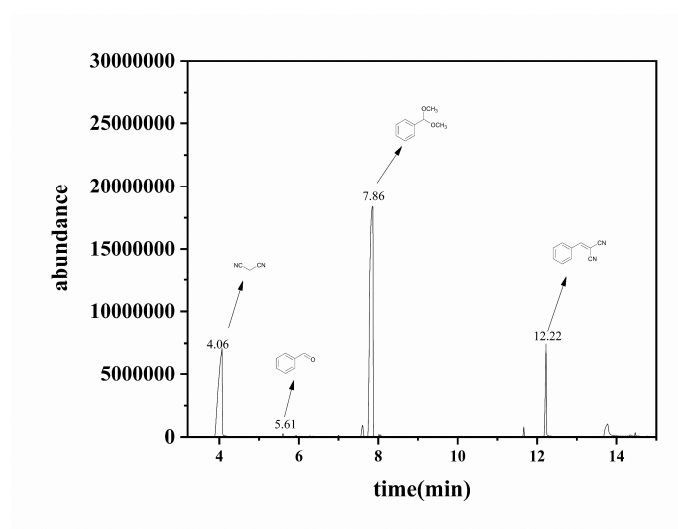

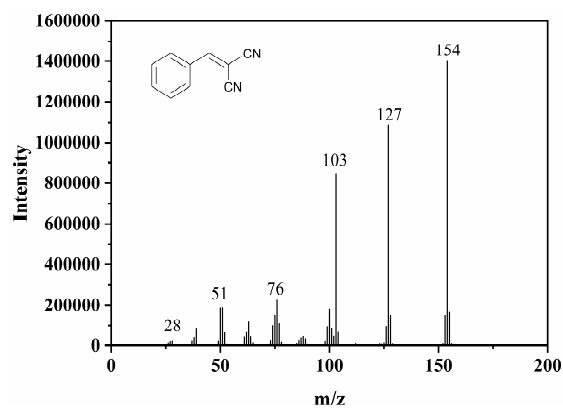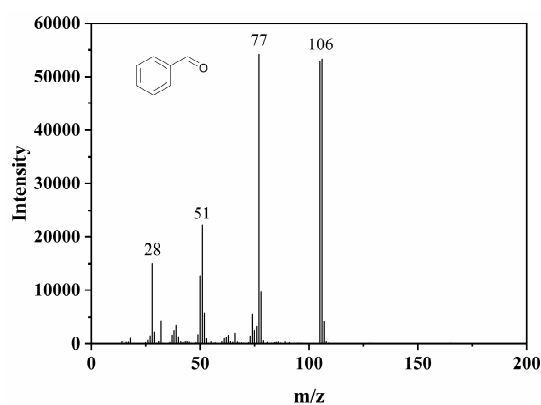

**Figure S14.** GC-MS spectrum of products after 2 hours of deacetalization-Knoevenagel tandem reaction by ZIF-8 in the emulsion.

**Table S1.** The surface areas, pore volumes, and pore sizes of the as-prepared catalysts.

| Catalyst                    | $S_{\text{BET}}$ ( $\text{m}^2/\text{g}$ ) <sup>a</sup> | $V_{\text{pore}}$ ( $\text{cm}^3/\text{g}$ ) <sup>b</sup> | Pore size (nm) <sup>c</sup> |
|-----------------------------|---------------------------------------------------------|-----------------------------------------------------------|-----------------------------|
| MIL-101(Cr)-NH <sub>2</sub> | 1990                                                    | 1.61                                                      | 3.24                        |
| UiO-66(Zr)-NH <sub>2</sub>  | 1044                                                    | 0.72                                                      | 2.76                        |
| ZIF-8                       | 1211                                                    | 0.65                                                      | 2.14                        |

<sup>a</sup>Specific surface area was measured by the BET method.

<sup>b</sup>Total pore volume

<sup>c</sup>Pore size determined by the BET method
